# Supplementary material for: Prognostic value of PD-L1 expression for surgically treated localized renal cell carcinoma: implications for risk stratification and adjuvant therapies
Source: PubMed Central journal article supplement — Ther Adv Urol. 2019 Oct 13;11:1756287219882600. doi: 10.1177/1756287219882600 (PMC6792277; doi:10.1177/1756287219882600), 2019-10-13
Supplement: Supplementary_table_1.pdf [file Supplementary_table_1.pdf]

**Supplementary table 1: Characteristics of cohort (n=738)**

| <b>Variable</b>                  | <b>Level</b> |
|----------------------------------|--------------|
| Age (year), median (IQR)         | 57 (49-64)   |
| Tumor size (cm), median (IQR)    | 5 (3-7.5)    |
| Follow-up (months), median (IQR) | 34 (15-62.9) |
| Gender, n (%)                    |              |
| Male                             | 414 (65.8)   |
| Female                           | 215 (34.2)   |
| ECOG performance status, n (%)   |              |
| 0                                | 405 (54.9)   |
| 1                                | 179 (24.3)   |
| 2                                | 41 (5.6)     |
| 3                                | 7 (0.9)      |
| Missing                          | 106 (14.3)   |
| AJCC tumor stage, n (%)          |              |
| pT1                              | 503 (68.2)   |
| pT2                              | 171 (23.2)   |
| pT3                              | 64 (8.7)     |
| Recurrences, n (%)               |              |
| Local                            | 30 (4.1)     |
| Distant                          | 73 (9.9)     |
| Local + Distant                  | 16 (2.2)     |
| Vital status, n (%)              |              |
| Alive with no disease            | 565 (76.6)   |
| Alive with disease               | 54 (7.3)     |
| Dead of disease                  | 88 (11.9)    |
| Dead from other cause            | 31 (4.2)     |

AJCC: American Joint Committee on Cancer; cm: centimeter; ECOG: Eastern Cooperative Oncology Group; IQR: interquartile range
